# Supplementary material
Source: PubMed Central journal article supplement (PMC7206053)
Supplement: 41418_2019_349_MOESM1_ESM.pdf [file 41418_2019_349_MOESM1_ESM.pdf]

| Supplemental Figure No. | Content                                                      |
|-------------------------|--------------------------------------------------------------|
| Supplemental Figure 1.  | Hierarchical clustering of kidney exosomal miRNA expression. |

**Supplemental Figure 1.**

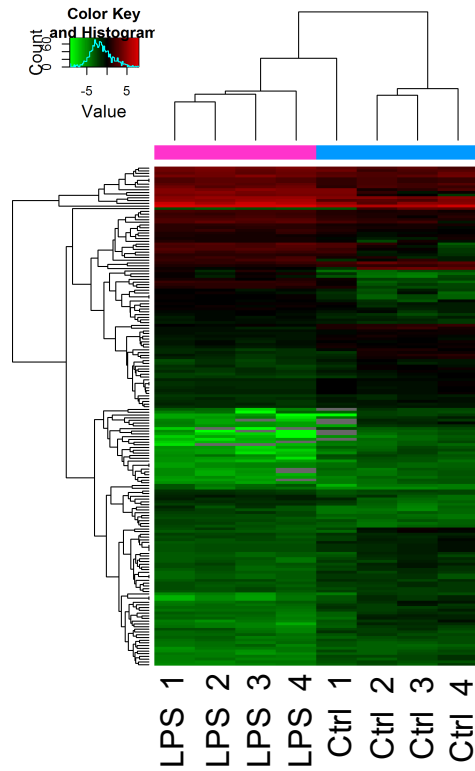

**Supplemental Figure1.**

Hierarchical clustering of kidney exosomal miRNA expression. Heat map shown miRNA expression detected by miRCURY LNA Arrays (Exiqon) in LPS treated and control mice (n=4 for each group).
